# Supplementary material for: YY1-Targeted RBM15B Promotes Hepatocellular Carcinoma Cell Proliferation and Sorafenib Resistance by Promoting TRAM2 Expression in an m6A-Dependent Manner
Source: PubMed Central journal article supplement (PMC9046568; doi:10.3389/fonc.2022.873020), 2022-04-14
Supplement: DataSheet_2.pdf [file DataSheet_2.pdf]

**Supplementary Table S1** Primer sequences used in this study.

| Primer name |   | Sequence (5'-3')       |
|-------------|---|------------------------|
| RBM15B      | F | TGAGGAACGGAGTAGGACCAA  |
|             | R | CTCGCTGTCTCTTGCCTTCT   |
| TRAM2       | F | TTCCGCAGGAGGACGAAAAG   |
|             | R | ACCTCGAACATAAGCCCGATG  |
| YY1         | F | ACGGCTTCGAGGATCAGATTC  |
|             | R | TGACCAGCGTTTGTTCATGT   |
| GAPDH       | F | GAAGGTGAAGGTCGGAG      |
|             | R | GAAGATGGTGATGGGATTTC   |
| MAP4        | F | TCTGAAGAATGTCCGCTCCAA  |
|             | R | TCTGAAGAATGTCCGCTCCAA  |
| KDM2A       | F | GGAGGTCTGGATGTCTGT     |
|             | R | GGAGGTCTGGATGTCTGT     |
| FLNB        | F | TCCTCCACTACTCCATCTCCAT |
|             | R | TTGCCGTCTTGCCAGTTCT    |
| CHD2        | F | CCGAAGCAGACAAGAACCATC  |
|             | R | CCGCTACTTGCCCTCTTCCTTA |
| MACF1       | F | ACAGCAGCACATCCATACGA   |
|             | R | TAGTTCCTCCTCCTCCTTCTCA |
| CTCF        | F | CTCATCCAGCATCAGAAGT    |
|             | R | CTCATCCAGCATCAGAAGT    |
| MAZ         | F | GCGTCTGCCTTGGAGAAGA    |
|             | R | GGAGATTGTAGCCGTTCTTGAA |
| RBM15B      | F | GCGTGGCAAGGTGTGATAA    |
| Primer 1    | R | GCAGTTGATGGAGTTGGAATAG |
| RBM15B      | F | TCGTCCTGAAGGTGATGAACA  |
| Primer 2    | R | CGTAAGAGCCAAGGATGAAGAG |
| RBM15B      | F | GGTCGTCCTGAAGGTGATGA   |
| Primer 3    | R | CGTAAGAGCCAAGGATGAAGAG |

**Supplementary Table S2** Primary antibodies used in this study

| Antigens           | Manufacturer                 | Catalog Number | Application        |
|--------------------|------------------------------|----------------|--------------------|
| RBM15B             | Proteintech                  | 67506-1-Ig     | 1:1000 for WB;     |
|                    | Proteintech                  | 22249-1-AP     | 1:500 for IHC      |
| TRAM2              | Proteintech                  | 13311-1-AP     | 1:1000 for WB      |
| N-cadherin         | Proteintech                  | 22018-1-AP     | 1:1000 for WB      |
| E-cadherin         | Proteintech                  | 20874-1-AP     | 1:1000 for WB      |
| Vimentin           | Proteintech                  | 10366-1-AP     | 1:1000 for WB      |
| YAP                | Cell Signaling<br>Technology | 14074          | 1:1000 for WB      |
| TAZ                | Cell Signaling<br>Technology | 72804          | 1:1000 for WB      |
| p-YAP              | Cell Signaling<br>Technology | 13008          | 1:1000 for WB      |
| p-TAZ              | Cell Signaling<br>Technology | 59971          | 1:1000 for WB      |
| YY1                | Proteintech                  | 2E11C5         | 1:1000 for WB      |
| GAPDH              | Proteintech                  | 1E6D9          | 1:1000 for WB      |
| N6-Methylguanosine | Abbkine                      | ABP52775       | Me-RIP             |
|                    | Scientific                   | 202003         | 1:500 for Dot Blot |
| IgG                | Servicebio                   | GB23301        | IP                 |
| HRP                | IPKine                       | A25222         | 1:1000 for WB; IP  |

**Supplementary Table S3** siRNAs and shRNA used in this study.

| Primer name | Sequence (5'-3')        |
|-------------|-------------------------|
| sh-NC       | TTCTCCGAACGTGTCACGT     |
| sh-RBM15B-1 | GGTGTTGCTTAAAGACAAA     |
| sh-RBM15B-2 | GGTGTTTGTGTTTGTGTTA     |
| sh-RBM15B-3 | AAAGCUAUCUCCUUUGACGUG   |
| si-NC       | UUCUCCGAACGUGUCACGUTT   |
| si-TRAM2-1  | GGAUCUCUCUCCAGCUCAAGG   |
| si-TRAM2-2  | GCAUCAUCUUAGAGGUCUAUU   |
| si-TRAM2-3  | AGGUAAAAUAAAUAGAAAGGC   |
| si-CTCF-1   | CAGACUCUGUAGUGUGUAAAU   |
| si-CTCF-2   | GGACAGUGUUGACAACUACU    |
| si-MAZ-1    | GAGAAGAGAUGGAGUCUUAGG   |
| si-MAZ-2    | ACAAAUCGUUAAAACCUAGCG   |
| si-YY1-1    | GCCUCUCCUUUGUAUUAUUAUTT |
| si-YY1-2    | GACGACGACUACAUUGAACAATT |
